# Supplementary material for: Mesoporous nano-WOx/ZrO2: facile synthesis and improved catalysis
Source: Royal Society of Chemistry journal article supplement (doi:10.1039/c6ra14951k), 2016-01-01
Supplement: c6ra14951k1.pdf [file c6ra14951k1.pdf]

## Mesoporous Nano- $\text{WO}_x/\text{ZrO}_2$ : Facile Synthesis and Improved catalysis

JunHua Zhu, Kangjian Tang,\* Yingchun Ye, Xiaohong Yuan, Weimin Yang\* and Yi Tang

### Supporting Online Information

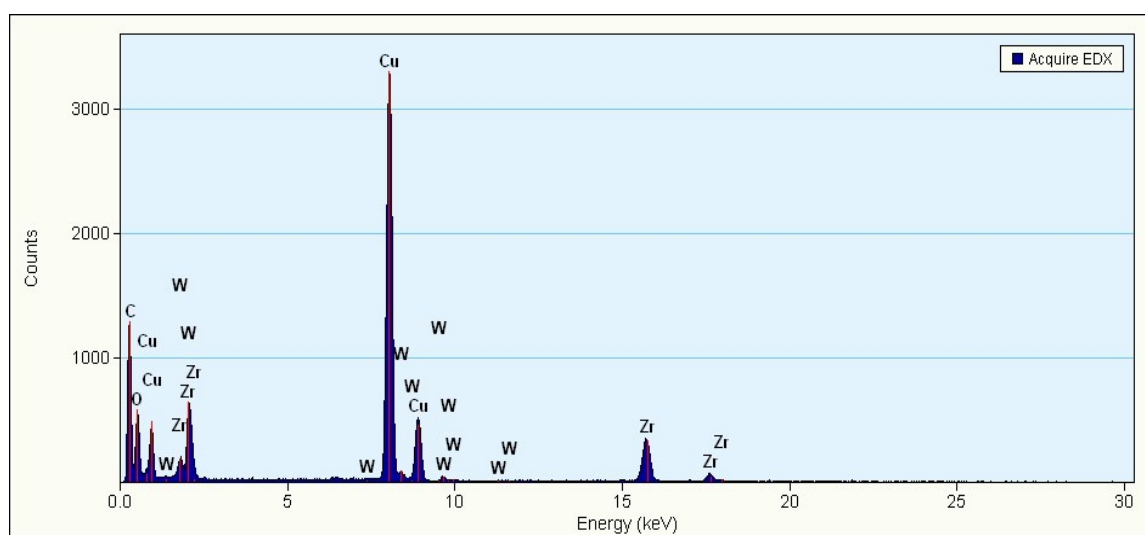

Figure. S1 EDX patterns of as-prepared mesoporous nano-  $\text{WO}_x/\text{ZrO}_2$  catalyst. The as-prepared product have rich Zr and W components.
